# Supplementary material for: An Abrupt Shift in the Arctic Ocean Warming due to Increased Extremes
Source: Research Square preprint supplement (doi:10.21203/rs.3.rs-6119832/v1), 2025-08-13
Supplement: Supplementary file 1 [file 4d9a74650c8c4085e2980f54.docx]

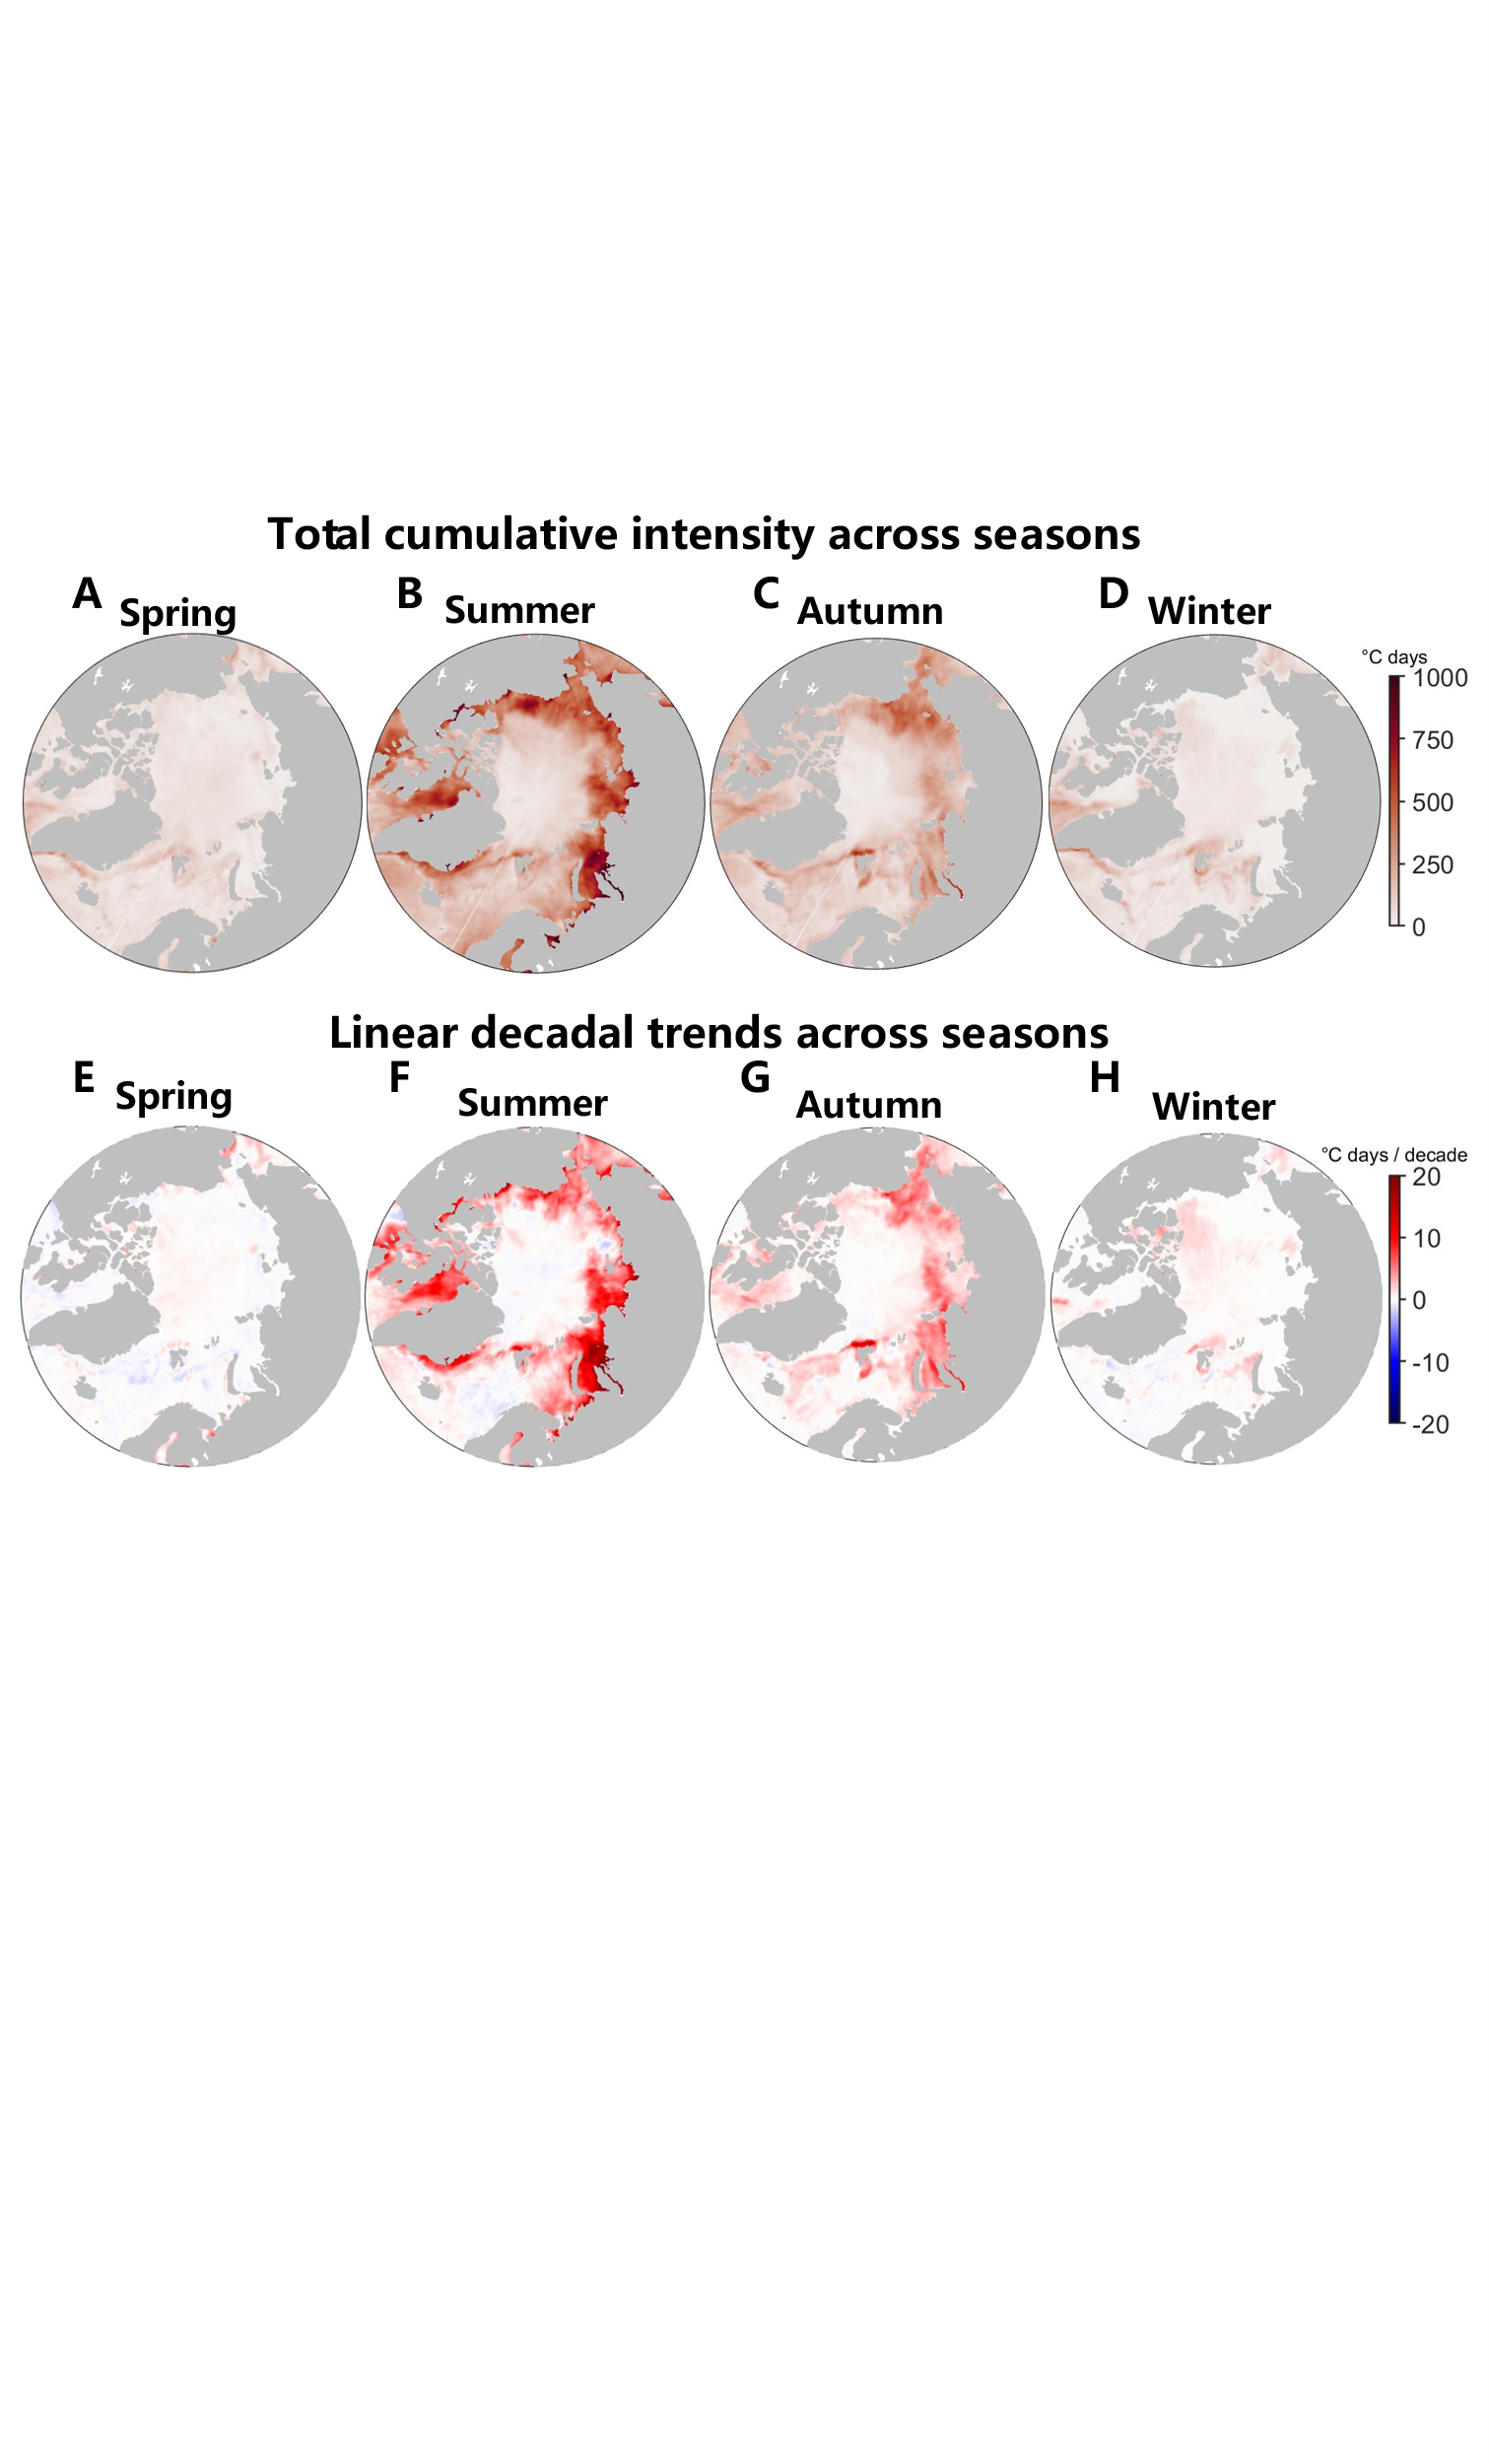


**Fig. S1. Seasonal Total Cumulative Intensity (CI) and Trends Across Seasons from 1982 to 2022.** **(A-D)** Mean CI of marine heatwaves for each season: spring (March-May), summer (June-August), autumn (September-November), and winter (December-February). **(E-H)** Linear decadal trends of seasonal mean CI for spring, summer, autumn, and winter.


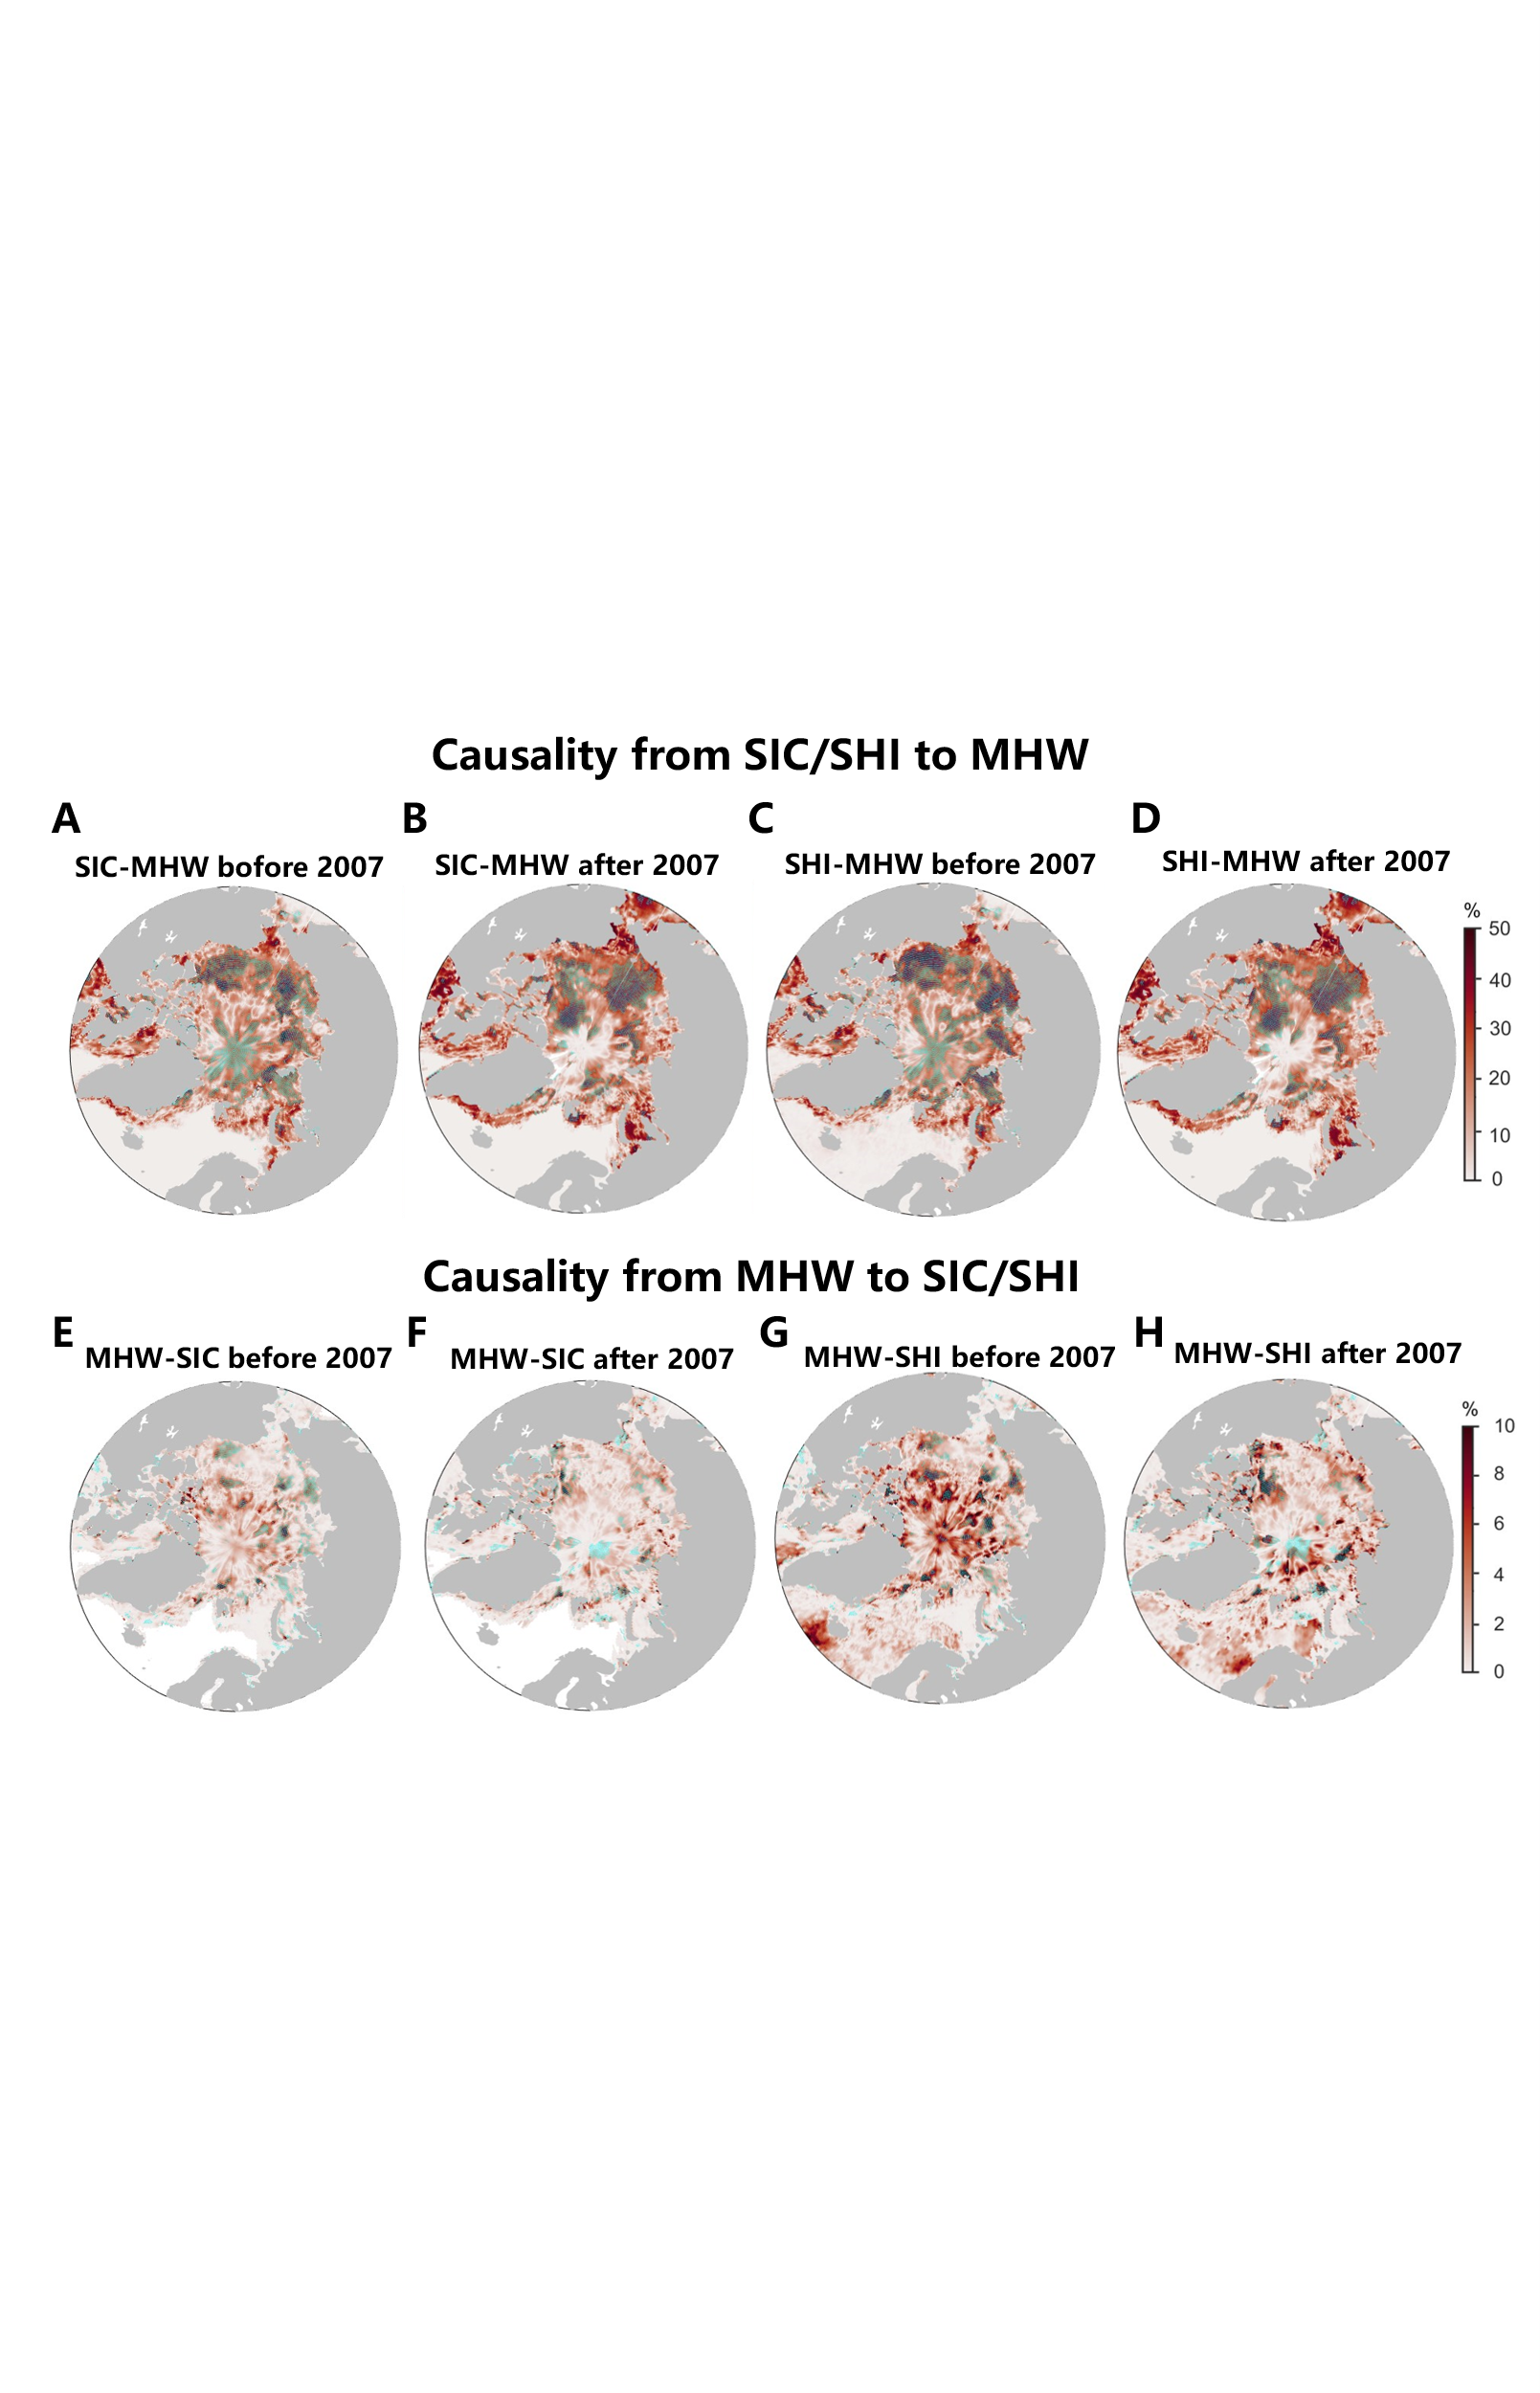


**Fig. S2. Causal Relationships between Marine Heatwaves (MHWs), Sea Ice Concentration (SIC), and Solar Heat Input (SHI).** **(A-B)** Causal relationships from SIC to MHWs before **(A)** and after **(B)** 2007. **(C-D)** Causal relationships from SHI to MHW before **(C)** and after **(D)** 2007. **(E-H)** Similar to **(A-D)**, but showing causality from SIC/SHI to MHWs. Cyan grid points indicate regions where the causal relationships are statistically significant at the 5% confidence level.


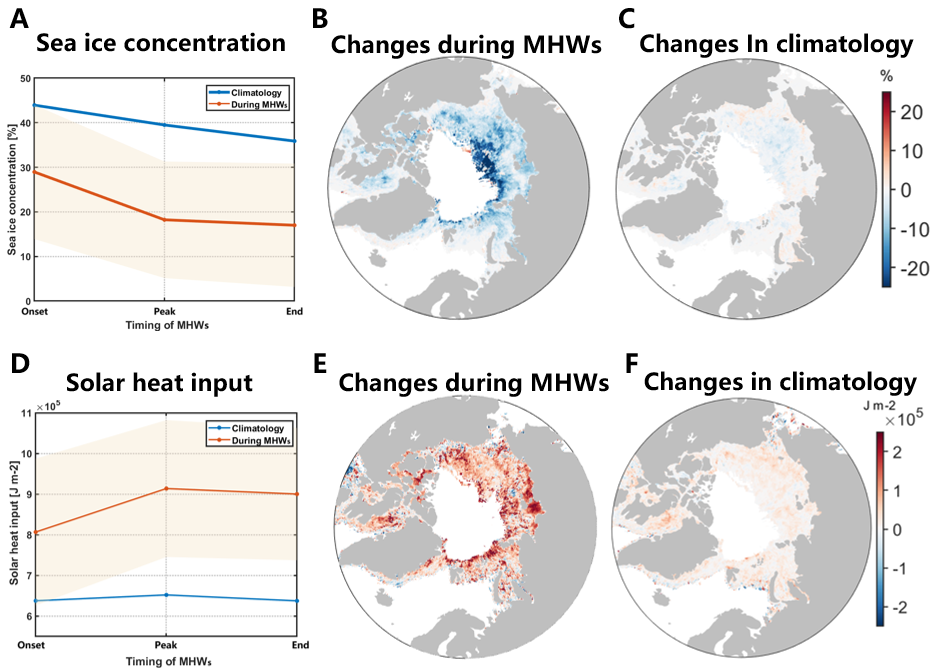


**Fig. S3. Sea Ice Concentration (SIC) and Solar Heat Input (SHI) during Marine Heatwave (MHW) Events (1982** **–2022).** **(A)** SIC at the onset of MHWs, at the peak of MHWs, and at the end of MHWs, along with the 41-year climatological mean for these dates. The composite mean of all MHW events is shown, with the shaded area representing uncertainty. **(B)** Composite SIC difference between the peak day of MHWs and the average SIC at the onset and end of MHWs. **(C)** Same as **(B)**, but using climatological dates (41-year mean). **(D-F)** Same as **(A-C)**, but for SHI.


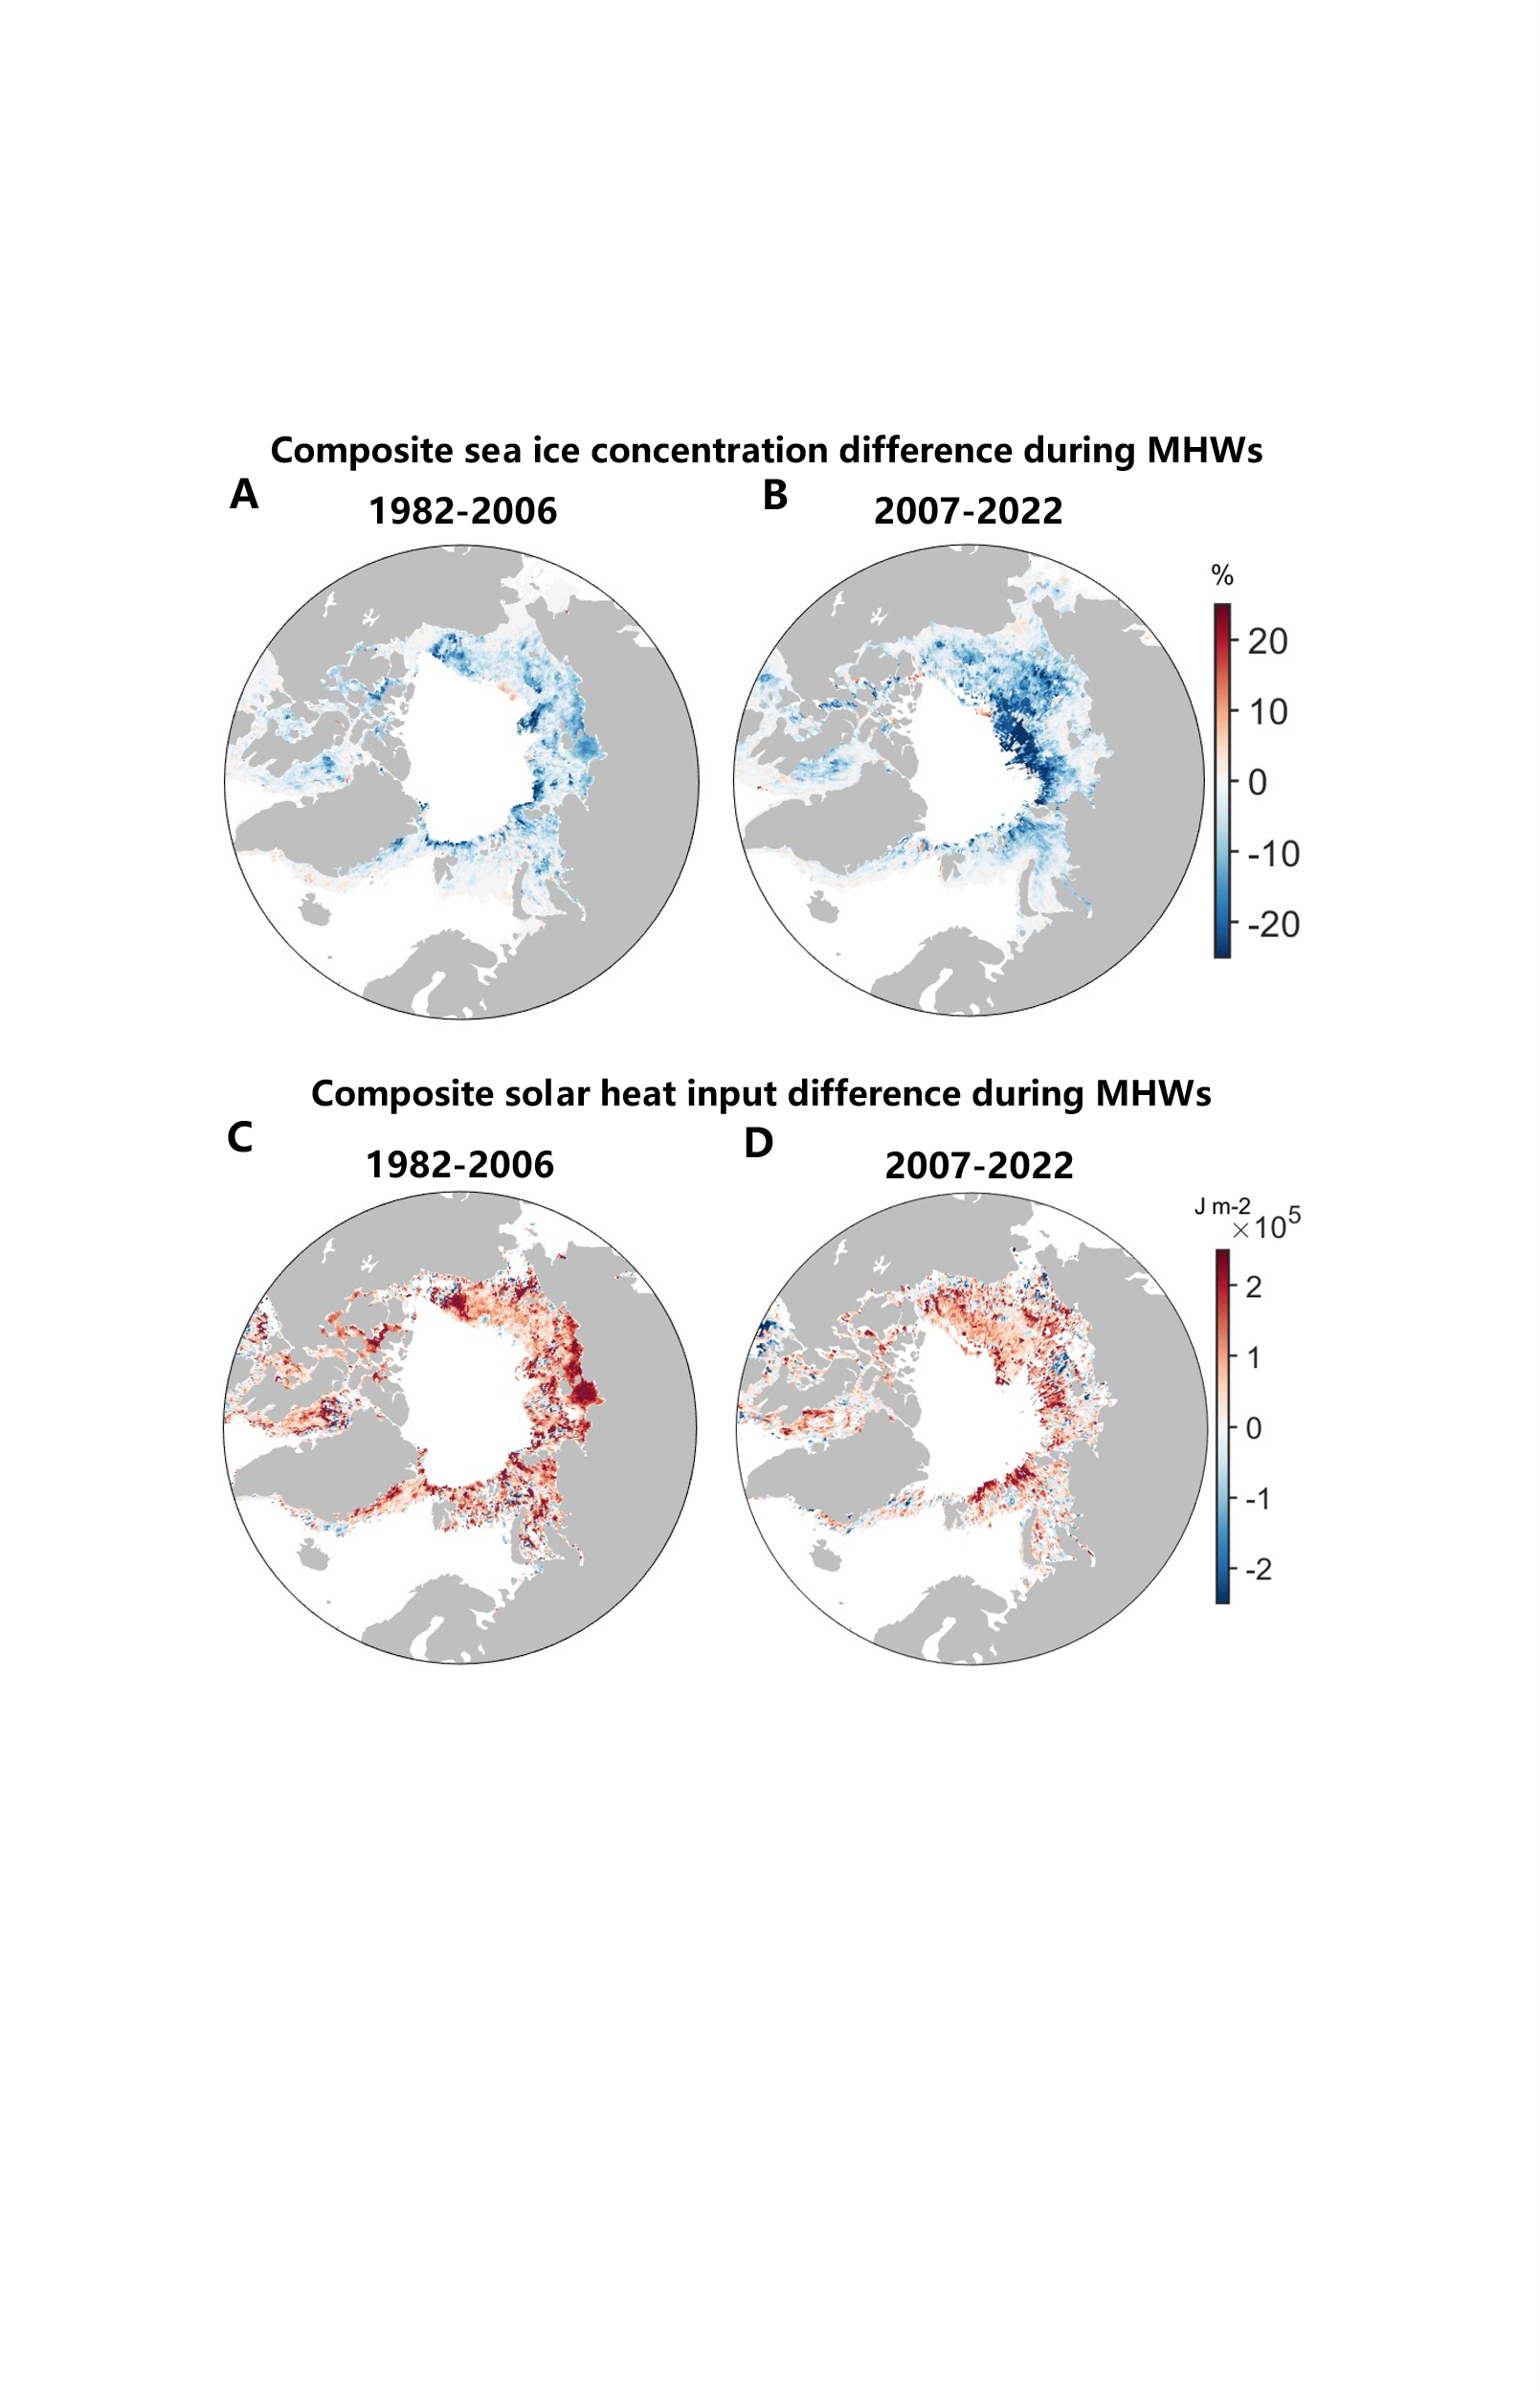


**Fig. S4. Composite Differences in Sea Ice Concentration (SIC) and Solar Heat Input (SHI) During Marine Heatwaves (MHWs)**. **(A)** Composite of the SIC difference between the day of maximum intensity and the average SIC at the onset and end of MHWs from 1982 to 2006. **(B)** Same as **(A),** but for the period 2007 to 2022.


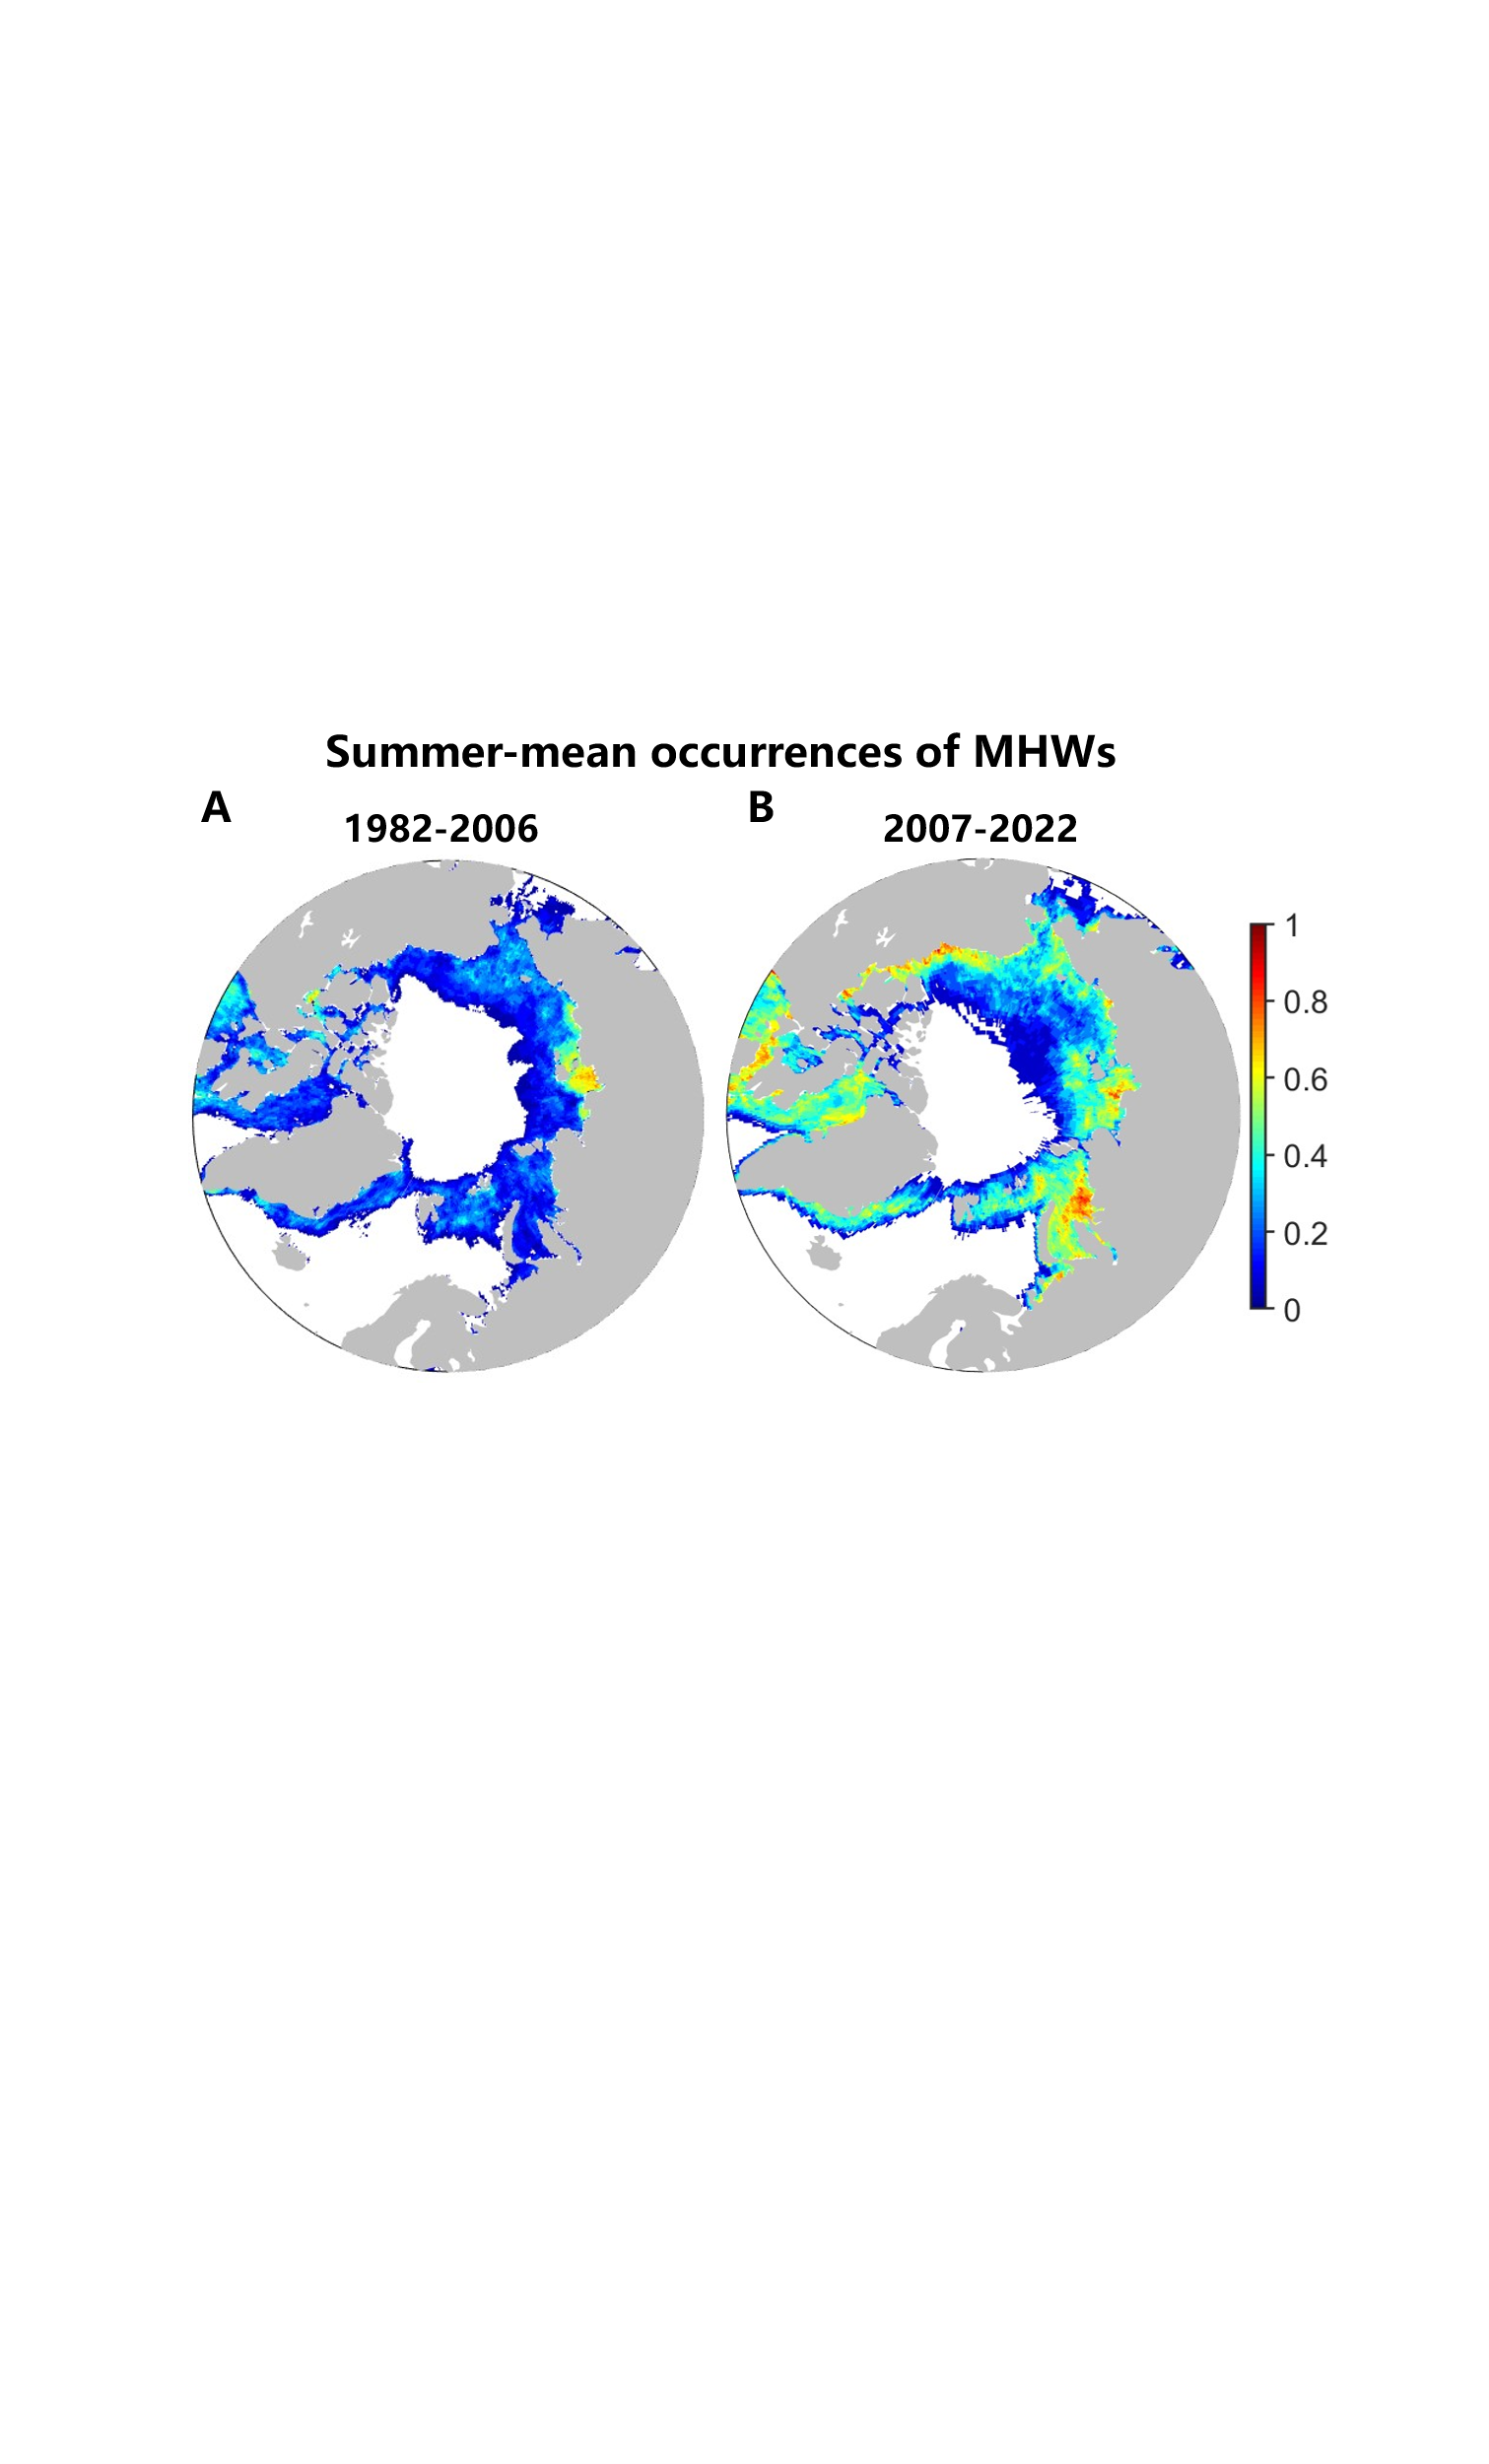


**Fig. S5. Summer Mean Occurrences of Marine Heatwaves (MHWs)**. **(A)** MHW occurrences from 1982 to 2006. **(B)** MHW occurrences from 2007 to 2022.
